# Supplementary material
Source: PubMed Central journal article supplement (PMC5741190)
Supplement: NIHMS928246-supplement-2.pdf [file NIHMS928246-supplement-2.pdf]

# Supplementary Information

## **TFIIH generates a five base-pair open complex during RNAP II transcription initiation and start-site scanning**

Eric J. Tomko<sup>1</sup>, James Fishburn<sup>2</sup>, Steven Hahn<sup>2</sup>, and Eric A. Galburt<sup>\*1</sup>

\*To whom correspondence should be addressed: [egalburt@wustl.edu](mailto:egalburt@wustl.edu)

<sup>1</sup> Biochemistry and Molecular Biophysics, Washington University School of Medicine, St. Louis, MO 63110, USA

<sup>2</sup> Division of Basic Sciences, Fred Hutchinson Cancer Research Center, Seattle, WA 98109, USA

### TATA-box dependence

While 88/992 (8.9%) traces showed activity with an intact TATA-box, 0/52 (0%) traces showed activity in the mutant (A → G, TGTGTGGTA) TATA-box that showed no transcription in a runoff transcription experiment (Fig. 1c,  $p = 0.008$  for null hypothesis of no TATA-dependence).

### pGOHis4TATA Sequence

The sequence of the PCR amplified region of pGOHIS4TATA used for making promoter DNA tether constructs is shown below:

```
GAGAGTACGCGTTCCTTGTGATGCTCGTCAGGGGGGCGGAGCCTATGGAGGAGCGCCAGCAACGCGGCCTGGTGACG
GTTTCTGGCCTTTTGGCTGGCCTTTTGGCTCACATGTTCTTTCTGCGTTATCCCCTGATTCTGTGGATAACCGTAGTA
CCGCCTTTGAGTGAGCTGATACCGCTCGCCGCAGCCGAACGACCGAGCGCAGCGAGTCAGTGAGCGAGGAAGCGGAA
GAGCGCCCAATACGCAAACCGCCTCTCCCCGCGCGTTGGCCGATTGAGATCTGCAGCTGGCAGCAGAGGTTTCCCGA
CTGGAAGCGGGCAGTGAGCGCAACGCGGTGAGTGTGAGTTAGCTCACTCATTAGGCACCCCAGGCTTGACACGTGA
TGCTCCCGGCTCGTATGTTGTGTGGAATTGTGAGCGGATAACAAGTTCACACAGGAAACAGCTATGACCATGATTAC
GCCAAGCGCGCACTCGACCCTCACTAAAGGGAACAAAAGCTGGGTACCGCGATAAGCTTAGCAGCTTGTGAGGTCGA
AGCGCTTCTGGAGAACTCAACGAGCTGGACGCGGATGAACAGGCAGACATCTGTGAATCGCTTACAGACCACGCTG
ATGAGCTTTACCGCAGCTGCCTCGCGCGTTTTCGGTGATGACGGTGAAAACCTCTGACACATGCAGCTCCCGGAGACG
GTCACAGCTTGTCTGTAAGCGGATGCCGGGAGCAGACAAGCCCGTCAGGGCGCGTCAGCGGGTGTGGCGGGTGTGCG
GGGCGCAGCCATGACCCAGTCACGTAGCGATAGCGGAGTGCCTGAACTGGATCAGTGACACAAGCTTGATATCGAATT
CCTGCAGCCCCGGGGATCGATCCGGGTGACAGCCCTCCGAATTCGAGCTCGGTACCCGGGGATCTGTGACCTCGAG
AACAGTAGCACGCTGTGTATATAATAGCTAAGGAACGTTTCGTTTACCTCCGCTGCGTGTGcACcTACAcAAATCC
TTAATACTCCATCCCTTACTGTGTAATAGTAATACAATAGTTTACAACGTTTCTGTTCTGAATAATGACCGGATCCGG
AGCTTGGCTGTTGCCCGTCTCACTGGTGACGAGAACAACCACCCTGGCGCCCAATACGCAAACCGCCTCTCCCCGCG
CGTTGGCCGATTGAGATCTGCAGCTAGAGCGGCCGCCACCAGCGGTGGAGCTCCAATTCGCCCTATAGTGAGTCGTAT
GACGCGCGCTCACTGGCCGTGCGTGCACAACGTCGTGACTGGGAAAACCTGGCGTTACCCAACAGTTGCGCAGCC
AGCACATCCCCCTTTCCGCGAGCTGGCGTAACAGCGAAGAGGCCCGCACCGATCGCCCTTCCCAACAGTTGCGCAGCC
TGAATGGCGAATGGGACGCGCCCTGTAGCGGCGCAGGACGCGCGGGGTGTGGTGGTTACGCGCAGCGTGACCGCT
ACACTTGCCAGCGCCCTAGCGCCCGCTCCTTTTCGCTTTCTTCCCTTCTTTCTCGCCACGTTGCGCCGGCTTTCCCGG
TCAAGCTCGAGACCGGGGGCTCCCTTTAGGGTTCCGACTTAGTGCTTTACGGCACCTCGACCCCGAGAGACTTGATT
AGGGTGATGGTTCACGTAGAGGGCCATCGCCCTGATAGACGGTTCGTCGCCCTTTGACGTTGGAGTCCACGTTCTAG
ATCTGTGGACTCTTGTTCAAACTGGAACAACACTCAACCCTATCTCGGTCTATTCTTTTATTGATTGAGAAGGGACTTT
GCCGATTTTCGGCCTATTGACTAGAACAGGAGCTGATTGACACGAAGGAACGCGAAGTGAACACGATATCAACGCTT
ACAAGCTAGGTGGCACTTCTCGGGAAATGTGCGCGGAACCCCTATGTGTGTACTTGTCTACGTACATTGAGGTATG
TATCCGCTCATGAGACAACCTACCCTGACGACTGCTTCAGTCTATTGAAACAGGAAGAGTATGAGTATTCAACATTT
CCGTGTCGCCCTGTATCCCTCCGTTGCGGCACATTGCCTTCTGTTCTTGCTCACCCCTAGGTCTCTC
```

The *S. cerevisiae* *HIS4* gene TATA sequence is shaded in red. The promoter was engineered to have a strong TSS using the sequence from the yeast U4 small RNA gene *SNR14* (green, with start-site bold underlined). Flanking sequences were engineered to eliminate the presence of TATA-like sequences. Additional site-directed mutagenesis in the region between TATA and *SNR14* TSS was required to eliminate TATA-independent transcription, lower case bases. The primers used to amplify the region are shaded in grey (dark, forward primer; light, reverse primer complement). The restriction sites used for attaching 1 kb upstream digoxigenin-labeled DNA (*Mlu*I, ACGCGT) and 1 kb downstream biotin-labeled (*Sty*I, CCTAGG) DNA are underlined.
